# Supplementary material for: Alkali metal doped crystalline g-C3N4 with an enriched cyano group for visible-light photocatalytic degradation of methylamine
Source: Royal Society of Chemistry journal article supplement (doi:10.1039/d3ra06066g), 2023-01-01
Supplement: d3ra06066g1.pdf [file d3ra06066g1.pdf]

Supplementary information

**Alkali metal doped crystalline g-C<sub>3</sub>N<sub>4</sub> with an enriched cyano group  
for visible-light photocatalytic degradation of methylamine**

**Peiyao Xiong<sup>a,b</sup>, Qian Li<sup>a,b,c</sup>, Qijun Tang<sup>a,b</sup>, Haiqiang Wang<sup>a,b\*</sup>, Zhongbiao Wu<sup>a,b\*</sup>**

*<sup>a</sup> Key Laboratory of Environment Remediation and Ecological Health, Ministry of Education, College of Environmental Resources Science, Zhejiang University, Hangzhou 310058, P.R. China.*

*<sup>b</sup> Zhejiang Tianlan Environmental Protection Technology Co., Ltd., Zhejiang Provincial Engineering Research Center of Industrial Boiler & Furnace Flue Gas Pollution Control, Hangzhou, 311202, P. R. China.*

*<sup>c</sup> Department of Environmental Science and Engineering, School of Petrochemical Engineering & Environment, Zhejiang Ocean University, Zhoushan, 316022, P. R.*

---

\* Corresponding author:

E-mail: haiqiangwang@zju.edu.cn, zbwu@zju.edu.cn ; Tel. / Fax: +86-571-87073074.  
Full postal address: Key Laboratory of Environment Remediation and Ecological Health, Ministry of Education, College of Environmental & Resources Science, Zhejiang University, Hangzhou, 310058, P.R. China.

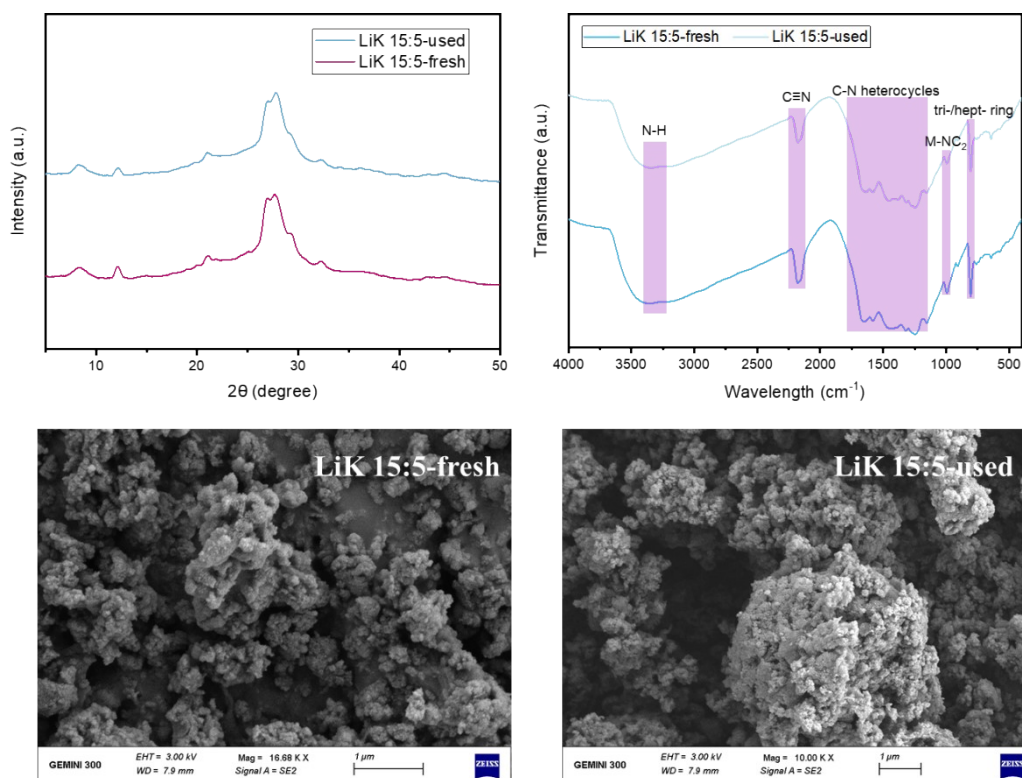

**Figure S1.** XRD spectra, FTIR spectra, and SEM image for the fresh or used LiK 15:5 sample.

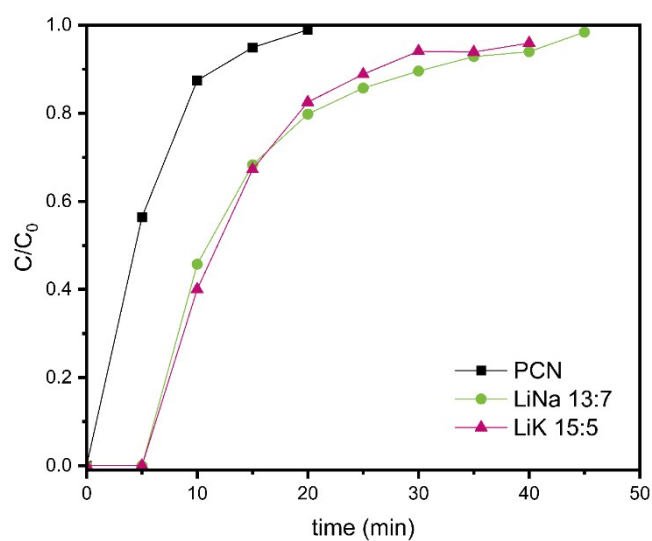

**Figure S2.** The adsorption breakthrough curve of methylamine on the catalyst surface.

**Table S1**

Doping amount of alkali metals of LiK 15:5 and LiNa 13:7 measured by ICP-MS.

| <b>Catalysts</b> | <b>Li content/ wt%</b> | <b>K content/<br/>wt%</b> | <b>Na content/ wt%</b> |
|------------------|------------------------|---------------------------|------------------------|
| <b>LiK 15:5</b>  | 1.3315                 | 4.7973                    |                        |
| <b>LiNa 13:7</b> | 0.9989                 |                           | 2.2920                 |
